1  
2  
3  
4  
5  
6  
7  
8  
9  
10  
11  
12  
13  
14  
15  
16  
17  
18  
19  
20  
21  
22

**Improvement of baculovirus as protein expression vector and as biopesticide by**

**CRISPR/Cas9 editing**

**Authors:** Verónica Pazmiño-Ibarra<sup>1+</sup>, Adriá Mengual<sup>1+</sup>, Alexandra Targovnik<sup>1,2,3</sup>, Salvador Herrero<sup>1\*</sup>

<sup>1</sup>Department of Genetics and Estructura de Recerca Interdisciplinar en Biotecnologia i Biomedicina (ERI-BIOTECMED), Universitat de València, 46100–Burjassot (Valencia), Spain

<sup>2</sup>Universidad de Buenos Aires. Facultad de Farmacia y Bioquímica. Departamento de Microbiología, Inmunología y Biotecnología. Cátedra de Biotecnología. Junín 956, 1113, Buenos Aires, Argentina

<sup>3</sup>CONICET-Universidad de Buenos Aires. Instituto de Nanobiotecnología (NANOBIOTEC). Junín 956, 1113, Buenos Aires, Argentina

<sup>+</sup>Equal contribution

\*Correspondence to:  
Salvador Herrero  
Universitat de València Department of Genetics  
Dr Moliner 50, 46100 Burjassot, Spain  
sherrero@uv.es  
Phone: + 34 96 354 30 06  
Fax: + 34 96 354 30 29

23 **Abstract**

24 The CRISPR (Clustered Regularly Interspaced Short Palindromic repeats) system associated  
25 Cas9 endonuclease is a molecular tool that enables specific sequence edition with high  
26 efficiency. The edition using CRISPR/Cas9 system has been successfully reported in small and  
27 large viral genomes. In this study, we have explored the use of CRISPR/Cas9 system for the  
28 edition of the baculovirus genome. We have shown that the delivering of Cas9-sgRNA  
29 ribonucleoprotein (RNP) complex with or without DNA repair template into Sf21 insect cells  
30 through lipofection might be efficient to produce knocks-out as well as knocks-in into the  
31 baculovirus. To evaluate potential application of our CRISPR/Cas9 method to improve  
32 baculovirus as protein expression vector and as biopesticide, we attempted to knock-out several  
33 genes from a recombinant AcMNPV form used in the baculovirus expression system as well as  
34 in a natural occurring viral isolate from the same virus. We have additionally confirmed the  
35 adaptation of this methodology for the generation of viral knocks-in specific regions of the viral  
36 genome. Analysis of the generated mutants revealed that the edition efficiency and the type of  
37 changes was variable but relatively high. Depending on the targeted gene, the rate of edition  
38 ranged from 10% to 40%. This study established the first report revealing the potential of  
39 CRISPR/Cas9 for the edition of baculovirus contributing to the engineering of baculovirus as  
40 protein expression vector as well as a biological control agent.

41 **Keywords:** CRISPR/Cas9, baculovirus, AcMNPV, genome editing, knock-out, knock-in

42

43

## 44 INTRODUCTION

45 Baculoviruses are rod-shaped DNA viruses with double stranded circular genome that infect  
46 invertebrates, particularly insects of the order Lepidoptera (1). They are widely used as  
47 biopesticide as well as versatile and powerful vector for recombinant protein expression (2). In  
48 nature, the baculovirus mainly infects Lepidoptera larvae when they feed on plant contaminated  
49 with the virus (3). During their viral biphasic life cycle, baculoviruses produce two distinct virion  
50 phenotypes: occlusion derived viruses (ODV) and budded viruses (BV). While ODV are  
51 involved in horizontal virus transmission from insect to insect through structures named  
52 occlusion bodies (OB) which have the virus embedded within, BV are involved in spread of the  
53 infection from cell to cell (4).

54 *Autographa californica multiple nucleopolyhedrovirus* (AcMNPV), the prototypic baculovirus  
55 most common used for biotechnological purpose, has a circular genome of about 134 Kb that  
56 contains 156 predicted open reading frames (ORF) (5). The baculovirus genomes, and specially  
57 AcMNPV genome, have been genetically modified in order to enhance their pesticide potency  
58 and increase the quality and quantity of the recombinant protein expressed in the system (6, 7).  
59 These modifications include either the deletion of non-essential genes for virus survival or  
60 infectivity and the insertion of foreign genes. For instance, in term of increase the insecticidal  
61 activity of baculovirus, the cry1Ab gene from *Bacillus thuringensis* and neurotoxins from  
62 scorpion venom have been incorporated into the baculovirus genome (8, 9). In addition, the *egt*  
63 gene (*Ac15*), involved in the inhibition of the molting, has been deleted from the virus  
64 significantly improving the speed of killing of the virus (10). Moreover, different attempt has  
65 been conducted to improve the heterologous protein expression in the baculovirus expression  
66 system (BEVS). It has been reported that simultaneous deletion of non-essential genes for the *in*

67 *vitro* replication of AcMNPV can enhance the expression of recombinant proteins (11, 12).  
68 Another strategy implemented has been the addition of heterologous genes into de viral genome  
69 with valuable properties for protein production (7).  
70 The baculovirus expression vector system (BEVS) has become a powerful platform to produce  
71 large quantity of recombinant proteins both in insect cells (Sf21, Sf9 and High Five™ cells) as in  
72 Lepidoptera larvae. The recombinant virus was originally obtained by replacing the polyhedrin  
73 gene from AcMNPV by co-transfection in insect cells with a viral genome and a donor plasmid  
74 (13). Different improvements have been developed to optimize the method for the generation of  
75 recombinant baculovirus. A remarkable success was the construction of the first bacmid that  
76 contained the whole AcMNPV genome and could can be propagated in *Escherichia coli* cells  
77 (14). The system, commercialized as Bac-to-Bac® system, is based on the introduction of a  
78 heterologous gene from a shuttle vector to the bacmid by transposition, producing a 100%  
79 recombinant progeny.  
80 In the last years, multiple approaches for viral genome engineering have been develop. Among  
81 the diverse genome editing technologies available, the clustered regularly interspaced short  
82 palindromic repeats-Cas9 system (CRISPR/Cas9) appears as the most successful tool for editing  
83 large viral genome (15). The system consists of a Cas9 endonuclease from *Streptococcus*  
84 *pyogenes* that cleaves double-stranded DNA (dsDNA) and an RNA complex (sgRNA) that direct  
85 sequence-specific dsDNA cleavage by Cas9. The double-strand break (DSB) are recognized and  
86 repaired by the cell endogenous mechanisms through non-homologous end joining (NHEJ) that  
87 produce insertions or deletions (indels), or homology-directed repair (HDR) in presence of a  
88 donor template DNA with homology to the sequence flanking the DSB (16–18). Recent  
89 developments in this technology have made possible to generated precise modifications into a

90 wide variety of viral genomes (19). However, the CRISPR/Cas9 system has not been applied for  
91 the edition of baculoviral genomes.

92 In this study, we developed for first time a CRISPR/Cas9-assisted method to edit AcMNPV  
93 genome in multiple ways and with different purposes. We have shown that the delivering of  
94 Cas9-sgRNA ribonucleoprotein (RNP) complex through lipofection in insect cells might be  
95 efficient to generate gene knock-out and knock-in. To evaluate potential application of our  
96 CRISPR/Cas9 method, we attempted to knock-out several genes from a recombinant baculovirus  
97 used for the BEVS to study their effect on recombinant protein production as well as in a natural  
98 occurring viral isolate to assess the potential of the methodology to improve baculovirus as a  
99 pesticide. In addition, we have also show that our methodology can also be used for the efficient  
100 introduction of foreign DNA on the genome of baculovirus.

101

## 102 **RESULTS**

### 103 **AcMNPV gene knock-out**

104 By direct transfection of the Cas9/RNP complex together to the viral genome of AcMNPV we  
105 were able to introduce different mutations in the targeted genes. The procedure was reproduced  
106 in several non-essential genes such as the *ODV-E26*, *F-Protein*, *p74* and *Ac18* with potential  
107 application to increase the recombinant protein production using the BEVS. In addition, we also  
108 attempted to edit *egt* gene to enhance the insecticidal properties of wild type (wt) AcMNPV.

109 The Cas9/sgrRNA complexes were assembled *in vitro* for each target gene described in Table 1.  
110 Individual viral clones were isolated from each edition by plaque assay and presence of indels in  
111 each of the selected clones was assessed by PCR amplification of the targeted region and Sanger  
112 sequencing.

113 Sequencing analysis revealed the successful edition of several clones of each of the targeted  
114 genes (Table 2). The edition efficiency and the type of changes was variable. Depending on the  
115 targeted gene, the rate of edition ranged from 10% to 40% of the analyzed clones. All the edited  
116 viruses had a deletion on the targeted gene, except for the *F-Protein#1* that showed an insertion  
117 of 125 nucleotides and *ODV-E26#1* that contains a deletion of 4 nucleotides and an insertion of  
118 16 nucleotides (Table 2). Except for one clone (*ODV-E26#1*), all the edited genes had a deletion  
119 located at the expected region (adjacent to the PAM site). In agreement with the strand targeting  
120 by the sgRNA (Table 2), all the deletion at the ODV-E26 gene were located down-stream from  
121 the PAM sequence, while deletion for the other genes were located up-stream from the PAM  
122 sequence. The effect of edition on the predicted protein was diverse. The different editions  
123 introduced frameshift mutations producing early stop codons (*ODV-E26#2-4*, *F-Protein#1*,  
124 *p74#1*, *Ac18#1*, and *egt#2-4*) or produce changes and deletion of few amino acids in the  
125 predicted protein (*ODV-E26#1*, *Ac18#2*, and *egt#1*) (Table 2).

126

### 127 **Effect of mutations on viral replication and recombinant protein production**

128 To compare the performance of the individual viruses in cell culture we focused on the mutants  
129 with a stop codon or a frameshift mutation derived from the edition of the recombinant virus  
130 (derived from Bac-to-Bac® system) and expressing the GFP protein under the *pSeL* promoter.  
131 No significant differences in the production of budded viruses was found among the different  
132 viruses, suggesting that the produced knocks-out were not affecting the viral infectivity and  
133 replication in cultured cells (Fig. 1). Next, we tested the recombinant protein production in Sf21  
134 cell of the different viruses. For this purpose, Sf21 cells were infected with the AcMNPV  
135 mutants at MOI 0.5 (Fig. 2A) and 5 (Fig. 2B). Three days post-infection, the cells were harvested

136 and the GFP activity was measured. No statically significant differences between the control and  
137 the mutants were found (p-value > 0.05) suggesting that knock-out of those genes does not have  
138 major effect on the recombinant protein production in cell culture.

139 Insect larvae can be used as an inexpensive alternative to fermentative technologies for protein  
140 production (7). We tested the effect of the previous mutations in protein production in *S. exigua*  
141 larvae. Last instar larvae were infected by intrahemocoelical injection with the AcMNPV mutants.  
142 72 hours post-infection, GFP expression was estimated by measuring the fluorescence intensity  
143 from the cellular extracts of the larvae (Fig. 3). No differences in GFP production were observed  
144 for the F-protein, p74, and Ac18 knocks-out. Although, all the ODV-E26 mutants showed  
145 protein expression values above the control viruses, only the values for the ODV-E26 #1 and  
146 ODV-E26 #3 had statistically significant differences, with GFP production values of at least five  
147 times higher than larvae infected with the control virus. Simultaneous quantification of the  
148 different ODV-E26 clones together reported a significant increase of about 5-fold in protein  
149 production (Fig.3). These results revealed that simple knock-out of *ODV-E26* using the  
150 CRISPR/Cas9 can be used to increase the recombinant protein yield in insect larvae.

151

### 152 **Insecticidal activity of AcMNPV mutant**

153 We have additionally showed the generation of CRISPR/Cas9 knocks-out on the wild type  
154 AcMNPV. Next, we tested if such viruses could become a recombinant free alternative to  
155 improve the insecticidal properties of baculovirus. Bioassays were performed to evaluate the *egt*  
156 mutants *in vivo*. Although we obtained different *egt* mutants (Table 2), the bioassay was  
157 restricted to the mutant *egt#2* (AcMNPV- $\Delta$ 49egt), which introduced an early stop codon and a  
158 frameshift mutation and to the wild-type (AcMNPV-WT) as control. At the tested concentration,

159 no differences in mortality (pathogenicity) was observed between both viruses (Fig. 4), however,  
160 as expected from previous EGT mutants (20, 21) the virulence (time needed to kill the insects)  
161 was slightly higher for the AcMNPV- $\Delta$ 49egt (Log-rank Mantel-Cox test;  $P < 0.005$ ). Under our  
162 experimental conditions, the Median survival time values of AcMNPV- $\Delta$ 49egt (120 h) was about  
163 10% lower than the obtained with the wild-type AcMNPV (132 h).

164

### 165 **Gene Knock-in of wild type viruses**

166 The capacity of our procedure to introduce foreign DNA sequences into specific regions of the  
167 AcMNPV genome was also tested. A fragment of DNA containing the *OpIE2* promoter and  
168 terminator driving the expression of the *eGFP* gene and flanked by sequences from the  
169 AcMNPV *chitinase* was used as a donor vector (Fig. 5A). The construction was then inserted  
170 into the *chitinase* locus of a recombinant AcMNPV expressing polyhedrin under the *polh*  
171 promoter (Bac-to-Bac system) using a similar procedure (see material and methods). Individual  
172 viruses obtained after the transfection were isolated by plaque assay and the rate of  
173 recombination was assessed by direct observation of eGFP production after infection of Sf21  
174 cells (Fig. 5B). On average, 20% (4 out of 20) of the isolated clones were expressing GFP. In  
175 addition, all the GFP positive clones were simultaneously expressing the recombinant *polyhedrin*  
176 as reflected on the presence of viral OBs, indicating that CRISPR/Cas9-mediated edition does  
177 not interfere with previous transgenes from the targeted virus.

178

179



## 180 **DISCUSSION**

181 In this study, we have shown the potential of using the CRISPR/Cas9 technology for the edition  
182 of baculovirus genomes to improve its use as protein expression system as well as insecticidal  
183 agent. Gene edition using CRISPR/Cas9 system has been recently reported in other viral  
184 genomes with biomedical implications such adenovirus (ADV) (22), type I herpes simplex virus  
185 (HSV-1) (15, 23), HIV-1 provirus (24), Epstein-Barr virus (25) and Human Cytomegalovirus  
186 (26). Our procedure has shown that baculovirus can also be edit with this system showing  
187 relatively high efficiency in the generation of random deletions or insertions in all targeted genes  
188 as well as specific gene insertions on the targeted loci.

189 Our procedure has shown efficient edition of all the genes that were initially targeted, though the  
190 efficiency was variable and ranged from 10 to 40% depending of the targeted gene. Since the  
191 transfection reactions were not systematically replicated, observed variability could be just  
192 caused by the stochastic variation or other factors such as the targeted sequence and the selected  
193 sgRNA (23). Although all the used sgRNA were validated *in vitro* and showed equivalent  
194 efficiency, the *in vivo* efficiency could depend on other cellular factors associated to the viral  
195 replication and the cellular repair after cleavage. It has been shown that *in vivo* efficiency can be  
196 improved using dual or multiplex sgRNA strategy (27). It would be interesting to test if the  
197 simultaneous use of multiple sgRNA targeting the gene of interest could increase the efficiency  
198 in the edition of baculovirus.

199 One of the advantages of the CRISPR/Cas9 technique lies in the existence of many alternative  
200 strategies for the delivering of the components into the nucleus (28). In our study, we transfected  
201 the RNP and viral DNA complex together into cells and isolated the initial viral progeny. This  
202 strategy has some advantages that could have contributed to the successful edition. First, RNP

203 complex has easy access to the viral DNA due to simultaneous entry into the nucleus. Second,  
204 the risk of generating off-target mutations is reduced because ribonucleoprotein complexes have  
205 short half-life in the nucleus (29–31). In addition, in case of viral fitness-cost associated to the  
206 introduced mutations, the isolation of the initial progeny prevents further dilutions of the  
207 generated mutants with the non-edited genotypes.

208 In this study, we exploited the CRISPR/Cas9 system to engineering AcMNPV genome for  
209 different applications. We knocked-out non-essential genes for viral survival or infectivity in cell  
210 culture aiming to increase the production of recombinant proteins. We have shown that knock-  
211 out of the *ODV-E26* gene, although does not enhances protein production in cell culture, had an  
212 important increase in GFP expression in *S. exigua* larvae. The molecular function of the ODV-  
213 E26 protein is unknown, but it has been shown to interacts with the IE0 and IE1 transcription  
214 factors of AcMNPV (4, 32). These two factors are fundamental for the replication of the virus  
215 since they are the main regulators and activators of transcription. It was described that the  
216 binding sites for IE0 and IE1 in ODV-E26 are between amino acids 126-153 and 72-99  
217 respectively. It was hypothesized that the function of ODV-E26 could be the regulation of these  
218 2 factors, and as a consequence of ODV-E26 knock-out, the IE0 and IE1 levels increase,  
219 contributing to the increase in expression of certain genes. In the present work the RNP produces  
220 a cut-off between amino acid 23 and 24 and although some of the clones obtained had an early  
221 stop codon or a frameshift mutation that affects the presence of the, the IE0 and IE1 binding  
222 sites. However, ODV-E26#1 is not directly affected on the IE0 and IE1 binding sites and shows  
223 a significant increase in protein production in the larvae.

224 The other knocked-out genes did not show effect on the protein expression in cells or larvae.  
225 Nevertheless, our results have confirmed that their function is not essential for viral replication

226 of the virus and open the possibility of using our procedure to test for simultaneous knocks-out  
227 of these or additional non-essential genes for the enhancement in the protein production.  
228 Previous studies have shown that single, as well as multiple deletion of certain viral genes, can  
229 increase the production of recombinant protein without affecting the cell viability. Different  
230 studies have shown that deletion of the *v-cath* and *chiA* genes, two enzymes responsible for the  
231 liquefaction of infected larvae improve the expression and stability of the recombinant proteins  
232 (11, 33–35). Latter improvements of these genomes were obtained by additional knocks-out of  
233 other non-essential genes for *in vitro* replication as *p26*, *p10* and *p74* (12). Due to the simplicity  
234 of the method reported here, procedures for systematic knock-out of all the AcMNPV predicted  
235 loci could reveal additional know-outs with enhanced protein productions.

236 Alternative strategy for the enhancement of protein production with baculovirus have been  
237 focused on the addition of certain genes into the viral genome. An example is the introduction of  
238 *vankyrin* genes from an insect virus *Campoplex sonorensis ichnovirus* (Fath-Goodin et al. 2009)  
239 that delays lysis of the infected cells, and an increased time for the expression of recombinant  
240 proteins. In another hand, glycosylation performance has also been improved by the  
241 simultaneous expression of glycosyltransferases (36, 37). Given the relatively high success rate  
242 obtained the gene knock-in presented in this work, our procedure could be easily applied for the  
243 simultaneous or serial insertion of those genes enhancing the expression, stability or properties of  
244 the recombinant proteins.

245 We have additionally shown the application of our procedure for the edition of wild type viruses  
246 and the generation of non-GM (genetically modified) viruses with potential applications in pest  
247 control. As a prove of concept we have targeted the *egt* locus. Previous studies have revealed the  
248 potential of truncation of this gene for the improvement of the insecticidal properties of

249 baculovirus (10, 21, 38–40). Our *egt* knock-out have shown similar levels of improvement as  
250 previous studies with other *egt* knock-out mutants generated by insertion on the *egt* locus of a  
251 selecting marker (10, 21, 39) and consequently considered as GM virus. From an applied point of  
252 view, and although certain countries are currently debating about the consideration of  
253 CRISPR/Cas9 mutants as GM or not (41, 42), our results provide new tools for the generation of  
254 GM-free virus with improved properties and potential use in the field. This methodology could  
255 be extended to other viruses and other viral loci for the generation of new viral strains with  
256 improved properties. For instance, two independent isolates from the *Cydia pomonella*  
257 granulovirus (CpGV) that are able to overcome resistance in the codling moth to the classical  
258 strains of CpGV have been recently isolated (43, 44). Although the mutations on these new  
259 isolates responsible for the overcoming resistant phenotype are still unknown, gene edition using  
260 CRISPR/Cas9 approaches could be used to engineering and improvement of new viral strains.  
261 In summary, with this work we have shown how CRISPR/Cas9 methodology can also be applied  
262 to the edition of baculovirus and could contribute to the engineering of baculovirus for the  
263 increasing the protein yield and properties of the recombinant proteins expressed using the  
264 BEVS as well as a to improve the biological properties of baculovirus as a pest control agent.  
265

## 266 **MATERIALS AND METHODS**

### 267 **Cell culture and insects**

268 The *Spodoptera frugiperda* (Sf21) insect cell line was cultured in Gibco® Grace's Medium (1X)  
269 (Thermo Fisher Scientific, Waltham) supplemented with 10% heat-inactivated fetal bovine  
270 serum (FBS) at 25°C.

271 *Spodoptera exigua* larvae were obtained from our laboratory colony. Larvae were reared on an  
272 artificial diet at 25-27°C with 70% relative humidity and a photoperiod of 16/8 hours (light/dark).

273

### 274 **Viruses and viral DNA**

275 Two types of AcMNPV genomes were targeted in this study. Wild type AcMNPV genome was  
276 derived from the C6 strain. The virus was replicated in Sf21 cells under standard conditions and  
277 the viral DNA was extracted using standard phenol/chloroform protocol (45). Briefly, Passage 1  
278 (P1) viral stock was harvested and centrifuged at  $500 \times g$  for 5 min. BVs clarified were  
279 concentrated by centrifugation at  $40.000 \times g$  for 1 hour. Pellet was resuspended in 200  $\mu$ l Virus  
280 Lysis Buffer (10 mM Tris-HCl pH 7.6, 10 mM EDTA, 0.5 % SDS) and 10  $\mu$ l proteinase K (10  
281 mg/ml) and incubated at 50 °C for 1 hour with shaking. 200  $\mu$ l of phenol/chloroform was added  
282 and centrifuged at  $14.000 \times g$  for 10 min. The aqueous phase was transferred to another tube  
283 and a 1/10 of volume of 3 M sodium acetate solution, 2 volumes of absolute ethanol, and 5  $\mu$ l, of  
284 glycogen (5 mg/ml) were added and kept overnight at -20 °C. The solution was then centrifuged  
285 at  $14.000 \times g$  for 15 minutes and the pellet was washed twice with ethanol 70 % by centrifuged at  
286  $8.000 \times g$  for 5 minutes. The dry pellet was resuspended in 30  $\mu$ l of TE (10 mM Tris-HCl pH 8.0,  
287 1mM EDTA).

288 In another hand, the bacmid DNA from recombinant AcMNPVs expressing eGFP under *pSeL*  
289 promoter (46) or Polyhedrin under the *polh* promoter (47) were generated in previous studies of  
290 the group using the Bac-to-Bac system (Thermo Fisher Scientific). Bacmid DNA was isolated  
291 following the manufacturer's instructions.

292

### 293 **AcMNPV knock-out**

294 The following genes were targeted in the recombinant pSeL-GFP-AcMNPV baculovirus:  
295 *ODV/E26* (NC\_001623.1: 13092-13769), *F-Protein* (NC\_001623.1:18513-20585), *p74*  
296 (NC\_001623.1:c121072-119135), and *Ac18* (NC\_001623.1:c15459-14398). For the edition of  
297 the wild type AcMNPV, *egt* gene (NC\_001623.1: 11426-12946) was selected.

298 The ribonucleoprotein (RNP) complex consisting in the Alt-R *S. pyogenes* Cas9 nuclease in  
299 complex with Alt-R CRISPR-Cas9 guide RNA (sgRNA) (IDT-Europe, Leuven) was generated  
300 *in vitro*. The sgRNA was generated by combining of the crRNA (CRISPR RNA) with the  
301 tracrRNA (trans-activating crRNA) in a 1:1 proportion, being the crRNAs the specific part of  
302 each targeted genes. The crRNAs were designed using the CHOP-CHOP online platform  
303 (<https://chopchop.rc.fas.harvard.edu>) and synthesized by Integrated DNA Technologies, Inc.  
304 (IDT-Europe). Gene specific crRNAs forming sgRNAs with the highest on-target and lowest off-  
305 target score were selected (Table 1). The targeted regions for each gene were limited to the 5'  
306 region of the coding region (limited to the first 30 % nucleotides).

307 For the assembly of the sgRNA, 1 µl of each crRNA (1 µM) were incubated at 95 °C for 5  
308 minutes with 1 µl of Alt-R tracrRNA (1 µM) (IDT-Europe) and 98 µl of Nuclease-Free Duplex  
309 Buffer (IDT-Europe). The RNP complex was then assembled in a final volume of 10 µl by  
310 combining 1 µl of sgRNA (100 ng/µl), 6.2 µl of the Cas9 (1 mM), and 2.8 µl of nuclease free

311 water. Finally, the mix was incubated at 37 °C for 5 minutes and stored at 4 °C. Efficacy of each  
312 RNP complex was previously analyzed using *in vitro* Cas9 digestion (data not shown). One  
313 microgram of purified viral DNA was co-transfected with 10 µl of the RNP complex *Sf21* cells  
314 at 70% confluence in Grace's Medium without FBS by using Cellfectin® II Reagent  
315 (Invitrogen). After 5 hours of incubation at 27 °C, the medium was replaced by Grace's medium  
316 supplemented with 10 % FBS and incubated for 72 hours at 27 °C. The transfection efficiency  
317 was confirmed by microscopic observation of GFP (for the pSeL-GFP-AcMNPV) or the  
318 presence of viral occlusion bodies (for the wt-AcMNPV). The supernatant containing the virus  
319 was cleaned by centrifugation at 500 x g and then stored at 4 °C.

320 Individual viruses derived from each transfection event were isolated from the supernatants  
321 (containing a mixture of edited and non-edited viruses) by plaque assay (O'Reilly et al, 1994).  
322 The individual clones were amplified in *Sf21* cells and a fraction (50 µl) was treated with  
323 PrepMan® Ultra reagent (Applied Biosystems™, Foster city) and used for PCR amplification of  
324 the targeted region using specific primers (Table 3). PCR products were purified and sequenced  
325 by Sanger sequencing to confirm the presence of mutations in the PAM-flanking region. Edited  
326 baculoviruses were further amplified to high-titer stocks in *Sf21* cells. Viral stock used in  
327 subsequent studies were tittered by qPCR using specific primers for the viral *DNApol*  
328 (Supplementary Table 1) as previously described (46). Non-edited baculovirus clones were also  
329 included as a control.

330

### 331 **AcMNPV knock-in**

332 The pU57-Kan-Chi-eGFP donor plasmid (Fig. 5) was designed using SnapGene software (from  
333 GSL Biotech; available at [www.snapgene.com](http://www.snapgene.com)) and artificially synthesized by Genscript

334 (Piscataway, NJ, USA). The length of upstream and downstream homology arms were 500 bp  
335 long and targeted the *chitinase* gene from AcMNPV. The *eGFP* gene was cloned under the  
336 control of the early viral promoter *OpIE-2*. The total length of the inserted sequence between the  
337 two homology arms was 1539 bp.

338 The RNP complex was generated as described above. One microgram of Viral DNA (AcMNPV  
339 expressing Polyhedrin under the *polh* promoter), 400 ng of the donor plasmid and 10  $\mu$ l of the  
340 RNP complex was co-transfect in *Sf21* cells at 70 % confluence in Grace's Medium without FBS  
341 by using Cellfectin® II Reagent. For that, viral DNA and the donor plasmid were previously  
342 mixed with the Cellfectin® II Reagent for 20 minutes, then the RNP was added and incubated  
343 for additional 20 minutes. Seventy-two hours post-transfection, the supernatant containing the  
344 virus was harvested and used to infect new Sf21 cells to confirm the presence of GFP foci  
345 (representing knock-in viruses). Individual clones were further isolated by plaque assay and  
346 amplified in *Sf21* cells. Correct location of the gene insertion on the chitinase locus was  
347 confirmed by PCR amplification and sequencing of the flanking regions (Table 3).

348

#### 349 **Infection assay in Sf21 cell culture and *S. exigua* larvae**

350 Sf21 cells were cultured in 24-well plate at a confluence of 70 %, then the cells were infected  
351 with the different baculoviruses at multiplicity of infection (MOI) of 0.5 and 5 and incubated at  
352 27 °C. The cells were collected 72 hours post-infection by centrifugation at 500 x g for 5 minutes  
353 and kept at -20 °C until the quantification of GFP fluorescence expression.

354 *S. exigua* larvae were infected by intrahemocoelic injection with 5  $\mu$ l of MQ-water containing 5  
355 x 10<sup>4</sup> BVs of the different baculoviruses (15 larvae for each assay). Larvae were incubated at 25  
356 °C for 72 h, then were frozen at -20 °C until its analysis.



357

### 358 **Analysis of GFP expression**

359 Frozen cells were lysated in lysis buffer (50 mM Tris-HCl pH 7.5, 100 mM NaCl, 1 mM DTT, 5  
360 % glycerol) and centrifuged at 16000 x g for 1 minutes. The supernatants were used for the  
361 determination of the expression of GFP by the determination of the emission of GFP  
362 fluorescence in a microplate reader (TECAN infinite M200Pro) ( $\lambda$  excitation 485 nm and  $\lambda$   
363 emission 535 nm). Values were expressed as the relative GFP fluorescence intensity, taken as 1  
364 of the value corresponding to the maximum intensity obtained with the control virus after  
365 normalization to the total number of cells. For all of the experiments, the reported values  
366 correspond to at least three independent replicates.

367 Frozen larvae were homogenised in group of 5 larvae in extraction buffer (0,01 % IGEPAL®  
368 CA-630 (Sigma-Aldrich, Saint Louis), 1 mM PMSF, 25 mM DTT in PBS 1X). Homogenates  
369 were centrifuged at 10,000 x g for 20 minutes at 4 °C. Supernatants were diluted and used for the  
370 determination of the expression of GFP as described above. The values were normalized  
371 according to the total protein quantified by Bradford using the Quick Start™ Bradford reagent  
372 (BioRad, Hercules, CA, USA). Values were expressed as the relative GFP fluorescence intensity,  
373 taken as 1 of the value corresponding to the maximum intensity obtained with the larvae infected  
374 with the control virus.

### 375 ***In vivo* evaluation of AcMNPV- $\Delta$ egt mutant**

376 For the production of viral OBs, The *Sf21* cells culture ( $6 \times 10^6$  cells) were infected with wild-type  
377 AcMNPV (strain C6) and *egt* edited virus at MOI 1 until most of cells were lysated. The  
378 resulting OBs and remaining cells were collected by centrifugation at 1,000 x g for 5 minutes  
379 and resuspension in 0,1 % SDS. The cell lysates containing the viral OBs were loaded over 40 %

380 sucrose solution and centrifuged at 30,000 x g for 30 minutes, the pellet was washed with water  
381 and centrifuged at 2,000 x g for 5 minutes. Finally, the pellet OBs were suspended in water and  
382 quantified using a Neubauer chamber.

383 Bioassays were performed in third instar *S. exigua* using the droplet feeding method (48). Stock  
384 suspensions of viral polyhedral ( $2 \times 10^8$  OBs/ml) were diluted, in a solution of 10 % sucrose and 1  
385 % phenol red stain. Larvae were reared at 26 °C and mortality was recorded each 12 hours until  
386 all larvae had died. The bioassay was performed side-by-side for the two viruses (AcMNPV- $\Delta$ egt  
387 and wt AcMNPV) and independently repeated three times. Mortality curves were assessed using  
388 the Kaplan–Meier method, and compared using the log-rank analysis (Mantel–Cox test) using  
389 GraphPad Prism software (GraphPad Software Inc., USA).

## 390 **Acknowledgments**

391 We thank Rosa Maria González-Martínez for her excellent help with insect rearing and  
392 laboratory management. This work was partially supported by ERC Consolidator Grant 724519  
393 Vis-a-Vis and the he Spanish Ministry of Economy, Industry and Competitiveness and by  
394 European FEDER funds (grant AGL2014-57752-C2-2R).

395

## 396 **References**

- 397 1. Jehle JA, Lange M, Wang H, Hu Z, Wang Y, Hauschild R. 2006. Molecular identification  
398 and phylogenetic analysis of baculoviruses from Lepidoptera. *Virology* 346:180–193.
- 399 2. Airene KJ, Hu Y-C, Kost TA, Smith RH, Kotin RM, Ono C, Matsuura Y, Wang S, Ylä-  
400 Herttuala S. 2013. Baculovirus: an Insect-derived Vector for Diverse Gene Transfer  
401 Applications. *Mol Ther* 21:739–749.
- 402 3. Shrestha A, Bao K, Chen Y-R, Chen W, Wang P, Fei Z, Blissard GW. 2018. Global  
403 Analysis of Baculovirus *Autographa californica* Multiple Nucleopolyhedrovirus Gene  
404 Expression in the Midgut of the Lepidopteran Host *Trichoplusia ni*. *J Virol* 92.
- 405 4. Rohrmann GF. 2013. Baculovirus Molecular Biology. *Baculovirus Molecular Biology*.  
406 National Center for Biotechnology Information (US).
- 407 5. Chen Y-R, Zhong S, Fei Z, Hashimoto Y, Xiang JZ, Zhang S, Blissard GW. 2013. The  
408 Transcriptome of the Baculovirus *Autographa californica* Multiple Nucleopolyhedrovirus  
409 in *Trichoplusia ni* Cells. *J Virol* 87:6391–6405.
- 410 6. Bonning BC, Nusawardani T. 2007. Introduction to the Use of Baculoviruses as  
411 Biological Insecticides, p. 359–366. *In* .
- 412 7. Martínez-Solís M, Herrero S, Targovnik AM. 2019. Engineering of the baculovirus  
413 expression system for optimized protein production. *Appl Microbiol Biotechnol* 103:113–  
414 123.
- 415 8. El-Menofy W, Osman G, Assaedi A, Salama M. 2014. A novel recombinant baculovirus  
416 overexpressing a *Bacillus thuringiensis* Cry1Ab toxin enhances insecticidal activity. *Biol*  
417 *Proced Online* 16:7.
- 418 9. Kong M, Zuo H, Zhu F, Hu Z, Chen L, Yang Y, Lv P, Yao Q, Chen K. 2018. The

- 419 interaction between baculoviruses and their insect hosts. *Dev Comp Immunol* 83:114–123.
- 420 10. O'Reilly DR, Miller LK. 1991. Improvement of a Baculovirus Pesticide by Deletion of the  
421 *egt* Gene. *Bio/Technology* 9:1086–1089.
- 422 11. Kaba SA, Salcedo AM, Wafula PO, Vlaskovic JM, Van Oers MM. 2004. Development of a  
423 chitinase and v-cathepsin negative bacmid for improved integrity of secreted recombinant  
424 proteins. *J Virol Methods* 122:113–118.
- 425 12. Hitchman RB, Possee RD, Crombie AT, Chambers A, Ho K, Siaterli E, Lissina O,  
426 Sternard H, Novy R, Loomis K, Bird LE, Owens RJ, King LA. 2010. Genetic  
427 modification of a baculovirus vector for increased expression in insect cells. *Cell Biol*  
428 *Toxicol* 26:57–68.
- 429 13. Smith GE, Summers MD, Fraser MJ. 1983. Production of human beta interferon in insect  
430 cells infected with a baculovirus expression vector. *Mol Cell Biol* 3:2156–65.
- 431 14. Luckow VA, Lee SC, Barry GF, Olins PO. 1993. Efficient generation of infectious  
432 recombinant baculoviruses by site-specific transposon-mediated insertion of foreign genes  
433 into a baculovirus genome propagated in *Escherichia coli*. *J Virol* 67:4566–79.
- 434 15. Lin C, Li H, Hao M, Xiong D, Luo Y, Huang C, Yuan Q, Zhang J, Xia N. 2016.  
435 Increasing the Efficiency of CRISPR/Cas9-mediated Precise Genome Editing of HSV-1  
436 Virus in Human Cells. *Sci Rep* 6:34531.
- 437 16. Ran FA, Hsu PD, Wright J, Agarwala V, Scott DA, Zhang F. 2013. Genome engineering  
438 using the CRISPR-Cas9 system. *Nat Protoc* 8:2281–2308.
- 439 17. Doetschman T, Georgieva T. 2017. Gene Editing With CRISPR/Cas9 RNA-Directed  
440 Nuclease. *Circ Res* 120:876–894.
- 441 18. Gaj T, Staahl BT, Rodrigues GMC, Limsirichai P, Ekman FK, Doudna JA, Schaffer D V.

- 442 2017. Targeted gene knock-in by homology-directed genome editing using Cas9  
443 ribonucleoprotein and AAV donor delivery. *Nucleic Acids Res* 45:e98–e98.
- 444 19. Lee C. 2019. CRISPR/Cas9-Based Antiviral Strategy: Current Status and the Potential  
445 Challenge. *Molecules* 24:1349.
- 446 20. Bianchi FJJ., Snoeiijing I, van der Werf W, Mans RM., Smits PH, Vlak JM. 2000.  
447 Biological Activity of SeMNPV, AcMNPV, and Three AcMNPV Deletion Mutants  
448 against *Spodoptera exigua* Larvae (Lepidoptera: Noctuidae). *J Invertebr Pathol* 75:28–35.
- 449 21. Cory JS, Clarke EE, Brown ML, Hails RS, O'Reilly DR. 2004. Microparasite  
450 manipulation of an insect: The influence of the *egt* gene on the interaction between a  
451 baculovirus and its lepidopteran host. *Funct Ecol* 18:443–450.
- 452 22. Bi Y, Sun L, Gao D, Ding C, Li Z, Li Y, Cun W, Li Q. 2014. High-Efficiency Targeted  
453 Editing of Large Viral Genomes by RNA-Guided Nucleases. *PLoS Pathog* 10:e1004090.
- 454 23. Suenaga T, Kohyama M, Hirayasu K, Arase H. 2014. Engineering large viral DNA  
455 genomes using the CRISPR-Cas9 system. *Microbiol Immunol* 58:513–522.
- 456 24. Ebina H, Misawa N, Kanemura Y, Koyanagi Y. 2013. Harnessing the CRISPR/Cas9  
457 system to disrupt latent HIV-1 provirus. *Sci Rep* 3:2510.
- 458 25. Yuen K-S, Chan C-P, Wong N-HM, Ho C-H, Ho T-H, Lei T, Deng W, Tsao SW, Chen H,  
459 Kok K-H, Jin D-Y. 2015. CRISPR/Cas9-mediated genome editing of Epstein-Barr virus in  
460 human cells. *J Gen Virol* 96:626–636.
- 461 26. King MW, Munger J. 2019. Editing the human cytomegalovirus genome with the  
462 CRISPR/Cas9 system. *Virology* 529:186–194.
- 463 27. Chen X, Xu F, Zhu C, Ji J, Zhou X, Feng X, Guang S. 2014. Dual sgRNA-directed gene  
464 knockout using CRISPR/Cas9 technology in *Caenorhabditis elegans*. *Sci Rep* 4:7581.

- 465 28. Lino CA, Harper JC, Carney JP, Timlin JA. 2018. Delivering CRISPR: a review of the  
466 challenges and approaches. *Drug Deliv* 25:1234–1257.
- 467 29. Kim S, Kim D, Cho SW, Kim J, Kim J-S. 2014. Highly efficient RNA-guided genome  
468 editing in human cells via delivery of purified Cas9 ribonucleoproteins. *Genome Res*  
469 24:1012–9.
- 470 30. Zuris JA, Thompson DB, Shu Y, Guilinger JP, Bessen JL, Hu JH, Maeder ML, Joung JK,  
471 Chen Z-Y, Liu DR. 2015. Cationic lipid-mediated delivery of proteins enables efficient  
472 protein-based genome editing in vitro and in vivo. *Nat Biotechnol* 33:73–80.
- 473 31. Liang X, Potter J, Kumar S, Zou Y, Quintanilla R, Sridharan M, Carte J, Chen W, Roark  
474 N, Ranganathan S, Ravinder N, Chesnut JD. 2015. Rapid and highly efficient mammalian  
475 cell engineering via Cas9 protein transfection. *J Biotechnol* 208:44–53.
- 476 32. Nie Y, Fang M, Theilmann DA. 2009. AcMNPV AC16 (DA26, BV/ODV-E26) regulates  
477 the levels of IE0 and IE1 and binds to both proteins via a domain located within the acidic  
478 transcriptional activation domain. *Virology* 385:484–495.
- 479 33. Suzuki T, Oda K, Watanabe H, Usami A, Okazaki H, Yamakawa M, Kadono-Okuda K,  
480 Takahashi S, Kanaya T, Mori H, Sato H, Ogawa K. 1997. Efficient protein production  
481 using a *Bombyx mori* nuclear polyhedrosis virus lacking the cysteine proteinase gene. *J*  
482 *Gen Virol* 78:3073–3080.
- 483 34. Hiyoshi M, Kageshima A, Kato T, Park EY. 2007. Construction of a cysteine protease  
484 deficient *Bombyx mori* multiple nucleopolyhedrovirus bacmid and its application to  
485 improve expression of a fusion protein. *J Virol Methods* 144:91–97.
- 486 35. Hitchman RB, Possee RD, Siaterli E, Richards KS, Clayton AJ, Bird LE, Owens RJ,  
487 Carpentier DCJ, King FL, Danquah JO, Spink KG, King LA. 2010. Improved expression

- 488 of secreted and membrane-targeted proteins in insect cells. *Biotechnol Appl Biochem*  
489 56:85–93.
- 490 36. Palmberger D, Wilson IBH, Berger I, Grabherr R, Rendic D. 2012. SweetBac: A New  
491 Approach for the Production of Mammalianised Glycoproteins in Insect Cells. *PLoS One*  
492 7:e34226.
- 493 37. Palmberger D, Klausberger M, Berger I, Grabherr R. 2013. MultiBac turns sweet.  
494 *Bioengineered* 4:78–83.
- 495 38. Chen X, Sun X, Hu Z, Li M, O’Reilly DR, Zuidema D, Vlak JM. 2000. Genetic  
496 Engineering of *Helicoverpa armigera* Single-Nucleocapsid Nucleopolyhedrovirus as an  
497 Improved Pesticide. *J Invertebr Pathol* 76:140–146.
- 498 39. Georgievska L, Hoover K, Werf W van der, Muñoz D, Caballero P, Cory JS, Vlak JM.  
499 2010. Dose dependency of time to death in single and mixed infections with a wildtype  
500 and *egt* deletion strain of *Helicoverpa armigera* nucleopolyhedrovirus. *J Invertebr Pathol*  
501 104:44–50.
- 502 40. Simón O, Williams T, López-Ferber M, Caballero P. 2012. Deletion of *egt* is responsible  
503 for the fast-killing phenotype of natural deletion genotypes in a *Spodoptera frugiperda*  
504 multiple nucleopolyhedrovirus population. *J Invertebr Pathol* 111:260–263.
- 505 41. Shew AM, Nalley LL, Snell HA, Nayga RM, Dixon BL. 2018. CRISPR versus GMOs:  
506 Public acceptance and valuation. *Glob Food Sec* 19:71–80.
- 507 42. Gelinsky E, Hilbeck A. 2018. European Court of Justice ruling regarding new genetic  
508 engineering methods scientifically justified: a commentary on the biased reporting about  
509 the recent ruling. *Environ Sci Eur* 30:52.
- 510 43. Eberle KE, Asser-Kaiser S, Sayed SM, Nguyen HT, Jehle JA. 2008. Overcoming the

- 511 resistance of codling moth against conventional *Cydia pomonella* granulovirus (CpGV-M)  
512 by a new isolate CpGV-I12. *J Invertebr Pathol* 98:293–298.
- 513 44. Berling M, Blachere-Lopez C, Soubabere O, Lery X, Bonhomme A, Sauphanor B, Lopez-  
514 Ferber M. 2009. *Cydia pomonella granulovirus* Genotypes Overcome Virus Resistance in  
515 the Codling Moth and Improve Virus Efficiency by Selection against Resistant Hosts.  
516 *Appl Environ Microbiol* 75:925–930.
- 517 45. O’Reilly DR, Miller L, Luckow VA. 1994. *Baculovirus expression vectors*: a laboratory  
518 manual. Oxford University Press.
- 519 46. Martínez-Solís M, Gómez-Sebastián S, Escribano JM, Jakubowska AK, Herrero S. 2016.  
520 A novel baculovirus-derived promoter with high activity in the baculovirus expression  
521 system. *PeerJ* 4:e2183.
- 522 47. Gasmi L, Boulain H, Gauthier J, Hua-Van A, Musset K, Jakubowska AK, Aury J-M,  
523 Volkoff A-N, Huguet E, Herrero S, Drezen J-M. 2015. Recurrent Domestication by  
524 Lepidoptera of Genes from Their Parasites Mediated by Bracoviruses. *PLOS Genet*  
525 11:e1005470.
- 526 48. Hughes PR, Wood HA. 1981. A synchronous peroral technique for the bioassay of insect  
527 viruses. *J Invertebr Pathol* 37:154–159.

528



529 **Figures legend**

530

531 **Figure 1. Effect of mutations on viral replication.** Final viral titer of the different AcMNPV  
532 mutants after 72 hours post infection in Sf21 cells infected at MOI 5. A non-edited virus was  
533 included as a control.

534

535 **Figure 2. Effect of mutations on recombinant protein production in cell culture.** GFP  
536 expression level in Sf21 cells infected with the different edited AcMNPV at MOI 0.5 (A) and 5  
537 (B). The GFP expression was measured as relative fluorescence intensity at 72 hours post  
538 infection. The results are expressed as the relative GFP fluorescence intensity, taken as 1 of the  
539 value corresponding to the maximum intensity obtained with the control virus. The values are the  
540 means of at least three independent assays. The error bars represent the standard error of the  
541 mean. A non-edited virus was included as a control.

542

543 **Figure 3. Effect of mutations on recombinant protein production in larvae.** Analysis of GFP  
544 expression level in *S. exigua* larvae infected with the different edited AcMNPV (A). The GFP  
545 expression was measured as relative fluorescence intensity at 72 hours post infection. The results  
546 are expressed as the relative GFP fluorescence intensity, taken as 1 of the value corresponding to  
547 the maximum intensity obtained with the control virus. The values are the means of at least three  
548 independent assays. The error bars represent the standard error of the mean. A non-edited virus  
549 was included as a control. The average value obtained with the four different ODV-E26 mutants  
550 is also reported (light grey bar). Representative image of *S. exigua* larvae infected with the  
551 recombinant virus (72 hours post infection) (B).

552 **Figure 4. Effect of *egt* deletion on AcMNPV virulence.** Time-mortality curves of the  
553 AcMNPV-WT vs AcMNPV- $\Delta$ 49egt viruses in *S. exigua* third instar larvae. The error bars  
554 represent the standard error of the mean from 3 independent replicates.

555  
556  
557

**Table 1.** Summary of sgRNA characteristics

| Target gene      | cRNA Sequence<br>(5'-3') | Localization <sup>1</sup> | Strand | GC (%) | Off-Target | Efficiency |
|------------------|--------------------------|---------------------------|--------|--------|------------|------------|
| <i>ODV-E26</i>   | G TTCACAGAACCGACCGGCA    | 71                        | -      | 60     | 0          | 0.61       |
| <i>F-Protein</i> | GATCTGGAATATGACGACAG     | 451                       | +      | 45     | 0          | 0.70       |
| <i>p74</i>       | AACTGGCTTTTCAGCAAGCGC    | 192                       | +      | 55     | 0          | 0.72       |
| <i>Ac18</i>      | GCCGTAGTTTGCGAAAACGG     | 130                       | +      | 55     | 0          | 0.77       |
| <i>egt</i>       | GTTTGGTCACTTGTACGATC     | 461                       | +      | 45     | 0          | 0.52       |
| <i>chitinase</i> | AGGCAATTTTGGACAGTTGA     | 720                       | +      | 40     | MM3*       | 0.47       |

558 <sup>1</sup>Localization: from the sequence adjacent to the protospacer adjacent motif (PAM) to initial ATG; + Coding DNA Sequence; -  
559 complementary DNA sequence. \*Number of mismatches.

560  
561  
562

563 **Table 2.** Summary of sequencing analysis of indels in target-site  
 564

| TARGET GENE      | SEQUENCE (5'-3')                                                                                                                                                                                                                                                                                                                                                                                                                | INDELS                                             | AMINO ACIDS                                                                                                                                                                                                 | EFFICIENCY |
|------------------|---------------------------------------------------------------------------------------------------------------------------------------------------------------------------------------------------------------------------------------------------------------------------------------------------------------------------------------------------------------------------------------------------------------------------------|----------------------------------------------------|-------------------------------------------------------------------------------------------------------------------------------------------------------------------------------------------------------------|------------|
| <i>ODV-E26</i>   | wt TTG <b>CCGTG</b> CCGGT <b>CGGTTCTGTGAAC</b> AGT<br>#1 TTG <b>CCGTG</b> CA <b>AGTTTTCTTTTTCT</b> CGGTTCTGTGAACAGT<br>#2 TTG <b>CCGTG</b> C-----GGTTCTGTGAACAGT<br>#3 TTG <b>CCGTG</b> C-----TGTGAACAGT<br>#4 TTG <b>CCGTG</b> C-----TCTGTGAACAGT                                                                                                                                                                              | (Δ4, +16 pb)<br>(Δ5 pb)<br>(Δ10 pb)<br>(Δ8 pb)     | wt LAVPV----GSVNSLTHTI<br>#1 LAV <b>QFFFF</b> LGSVNSLTHTI<br>#2 LAV <b>R</b> FCEQFDTHHHLHRRH<br>#3 LAVL* <b>T</b> V*HTPSPPPSPA<br>#4 LAVL <b>CE</b> QFDTHHHLHRRHQ                                           | 40%        |
| <i>F-Protein</i> | wt CAAGATCTGGAATATGACGACAG <b>CGTGA</b><br>#1 CAAGATCTGGAATATGACGA (+125 bp) <b>CAGCGTGA</b>                                                                                                                                                                                                                                                                                                                                    | (+125 pb)                                          | wt EYD <b>D</b> SGEFDVYDEYEQPSHW<br>#1 EYD <b>EN</b> CAKISSLYVASAPVC                                                                                                                                        | 10%        |
| <i>p74</i>       | wt TGG <b>AACTGG</b> C <b>TTT</b> CAGCAAGCGGGTGT<br>#1 TGG <b>AACTGG</b> C <b>TTT</b> CA-----CGCGGTGT                                                                                                                                                                                                                                                                                                                           | (Δ5 pb)                                            | wt LAFSKRGCVSMSCYPFHETG<br>#1 LAF <b>TRV</b> *KHELLSVSRNRRR                                                                                                                                                 | 10%        |
| <i>Ac18</i>      | wt GAA <b>G</b> CCGTAGTTTGC <b>GAAA</b> CGGCGGTTT<br>#1 GAA <b>G</b> CCGTAGTTTGC <b>GAA</b> --CGGCGGTTT<br>#2 GAA <b>G</b> CCGTAGTTTGC <b>G</b> A-----CGGTTT                                                                                                                                                                                                                                                                    | (Δ2 pb)<br>(Δ6 pb)                                 | wt VCEN <b>G</b> GLFVLTGGAAV <b>T</b> CHI<br>#1 VC <b>ERR</b> FIRVNWRRSRDMPY*<br>#2 VCD-- <b>GL</b> FVLTGGAAV <b>T</b> CHI                                                                                  | 20%        |
| <i>egt</i>       | wt AGTCGTCGTGGAAGCGTTT <b>G</b> CCGATTATGCGTT <b>G</b> GTGTT <b>G</b> GTCACTTGTACGAT <b>CCGG</b> CGC<br>#1 AGTCGTCGTGGAAGCGTTT <b>G</b> CCGATTATGCGTT <b>G</b> GTGTT <b>G</b> -----AT <b>CCGG</b> CGC<br>#2 AGT <b>G</b> -----AT <b>CCGG</b> CGC<br>#3 AGTCGTCGTGGAAGCGTTT <b>G</b> CCGATTATGCGTT <b>G</b> GTGTT <b>G</b> GTCACTT <b>G</b> T <b>A</b> --AT <b>CCGG</b> CGC<br>#4 AGTCGTCGTGGAAGCGTTT <b>G</b> CCGATTATGCGT----- | (Δ12 pb)<br>(Δ49 pb, ,+1pb)<br>(Δ2 pb)<br>(Δ67 pb) | wt LVVVEAFADYALVFGHLYDPAP<br>#1 LVVVEAFADYALVFD <b>---</b> DPAP<br>#2 LV <b>I</b> RRP* <b>F</b> KSRLATVWRK <b>L</b> TR<br>#3 LVVVEAFADYALVFGHL* <b>S</b> GAR<br>#4 LVVVEAFADYA* <b>T</b> L <b>TR</b> SAPWRG | 18%        |

565 **Nucleic acid and amino acid sequence annealing of the targeting sites on the wild-type (wt) and the edited genes sequences.**  
 566 Bases in violet: protospacer adjacent motif (PAM); in blue: 20 nucleotides corresponding to the AltR cRNA recognition site; in red:  
 567 insertion bases. Dotted line: each dot corresponding to a single base deletion. Amino acid in orange: amino acid from PAM site. Δ:  
 568 number of bases deleted. +: insercions, \* Stop codon.  
 569

570 **Table 3.** Summary of Primers employed in the study

571

| GENE                                | Orientation | Sequence (5'-3')         |
|-------------------------------------|-------------|--------------------------|
| <i>ODV-E26</i>                      | F           | CGTTTCCAGCGATCAACTAC     |
|                                     | R           | TCTGTGCGTTGTCTTCTTCTGT   |
| <i>F-Protein</i>                    | F           | TATCATGGACGGTGTAAGCTG    |
|                                     | R           | GGATACAGTCATGTTGCTCCAA   |
| <i>p74</i>                          | F           | GGTTTTAACAGCCGTCGATTTA   |
|                                     | R           | TAAGATGCATTTGTTGTCGAGC   |
| Ac18                                | F           | ATTGGCAAATAAAGTTGCAAGG   |
|                                     | R           | GCACATTAAGTGGTCGTTCAAA   |
| EGT                                 | F           | CCAGTACAGTTATTCGGTTTGAAG |
|                                     | R           | GCTCTTTACAAGATGGATTCCTCC |
| <i>DNA polymerase</i>               | F           | GGGTCAGGCTCCTCTTTGC      |
|                                     | R           | TTACGCAGCCATCACAAACAC    |
| Chitinase insertion<br>(left harm)  | F           | ACAACGCCGTACACAAACAA     |
|                                     | R           | GTCCGGTCCGATAATGTGAT     |
| Chitinase insertion<br>(right harm) | F           | CGACCACTACCAGCAGAACA     |
|                                     | R           | CGCTGTCAAACGAAATCAAA     |

572

573

574

575

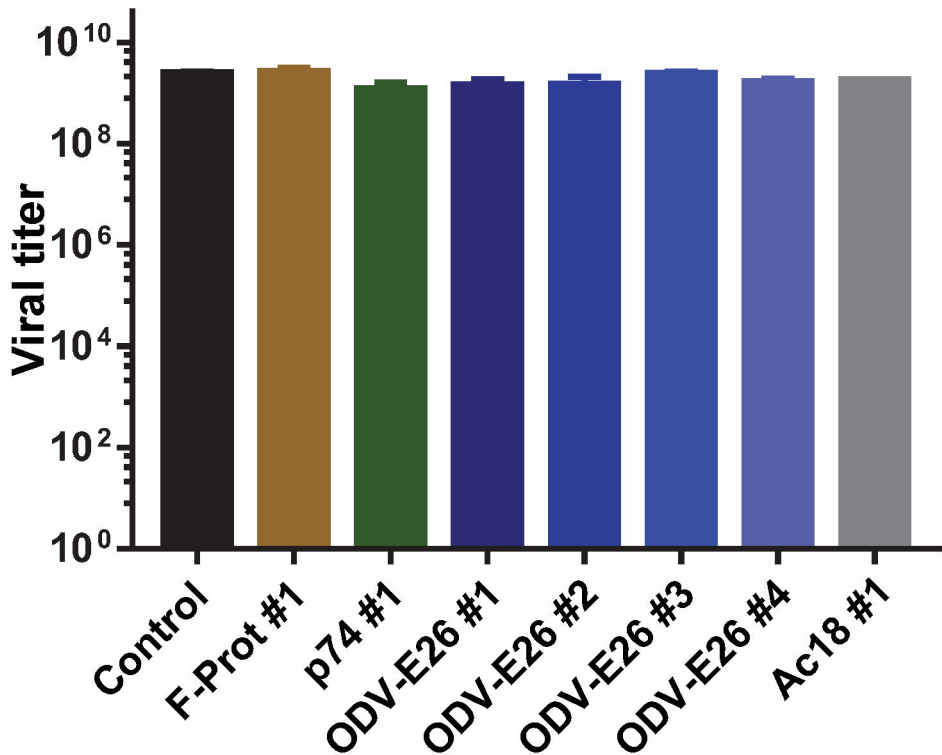

A

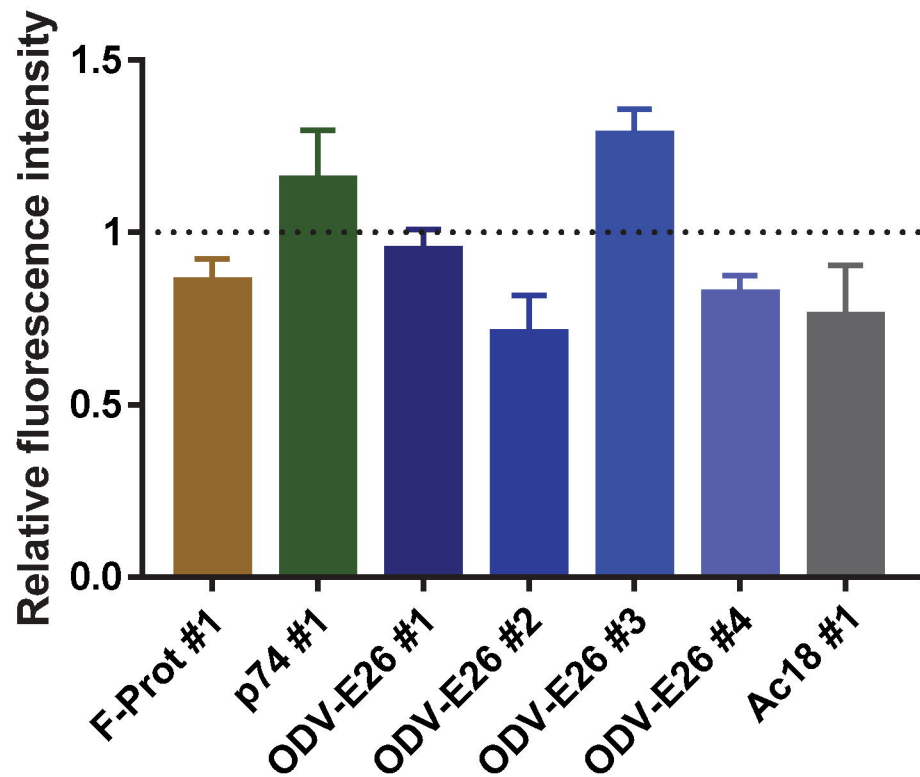

B

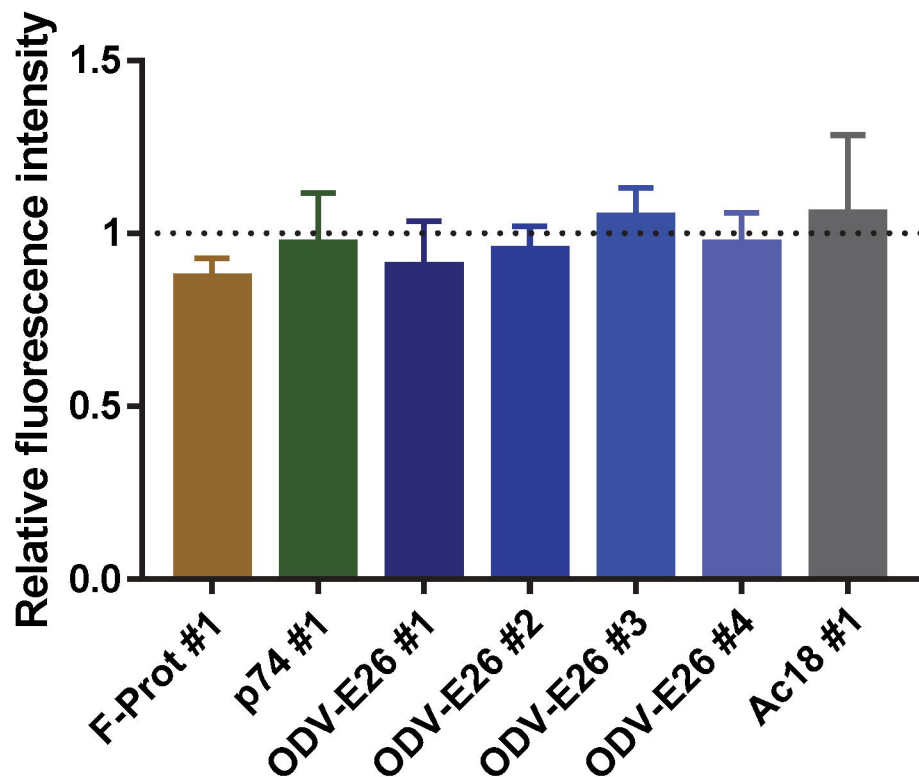

**A**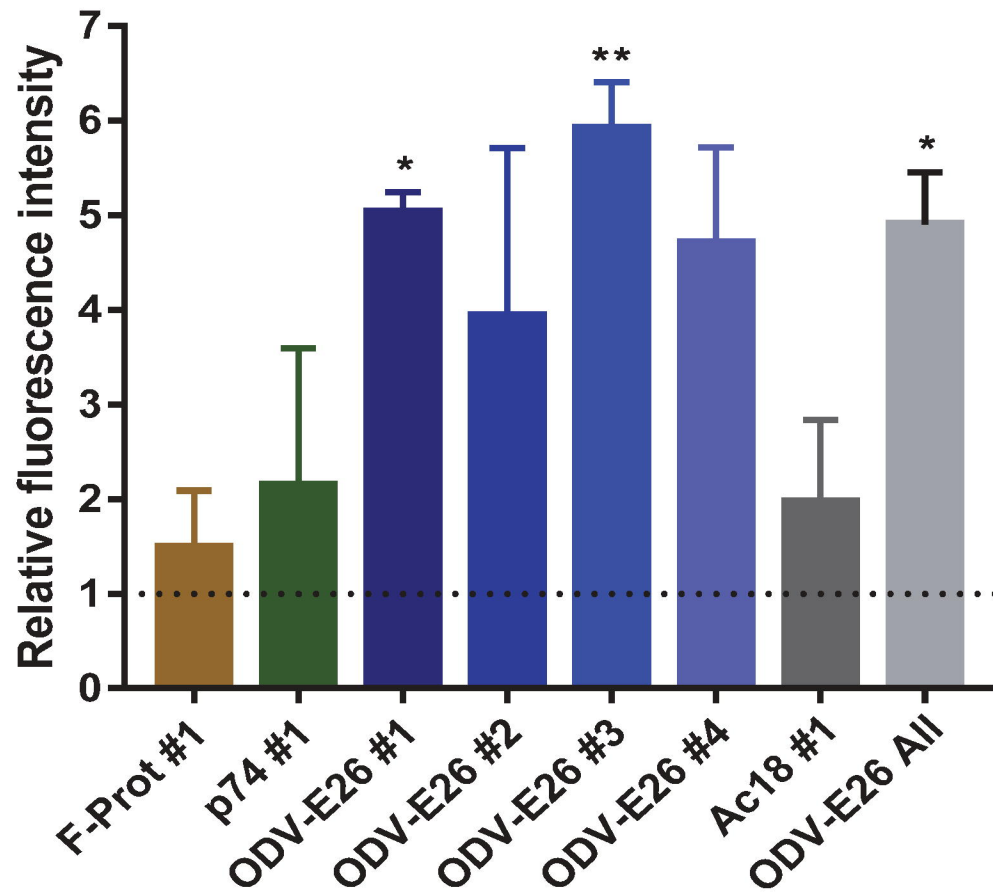**B**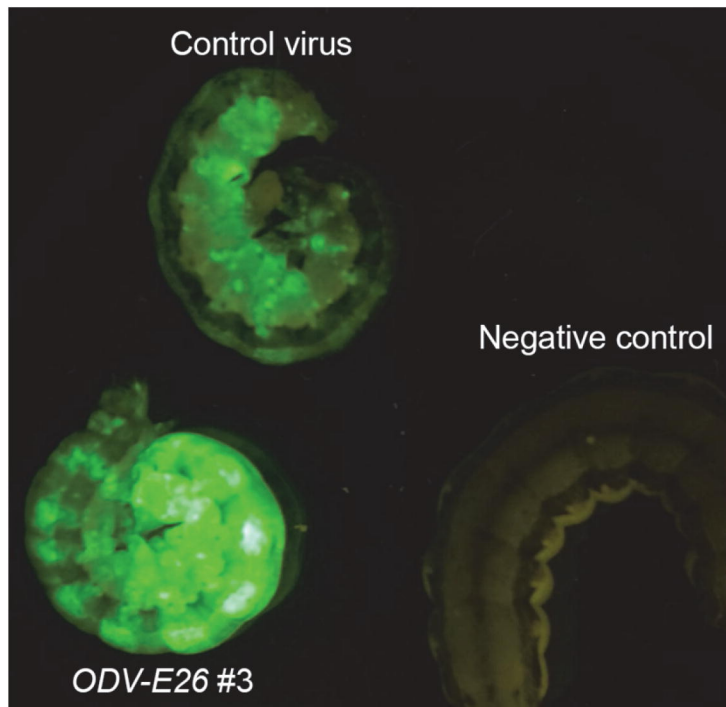



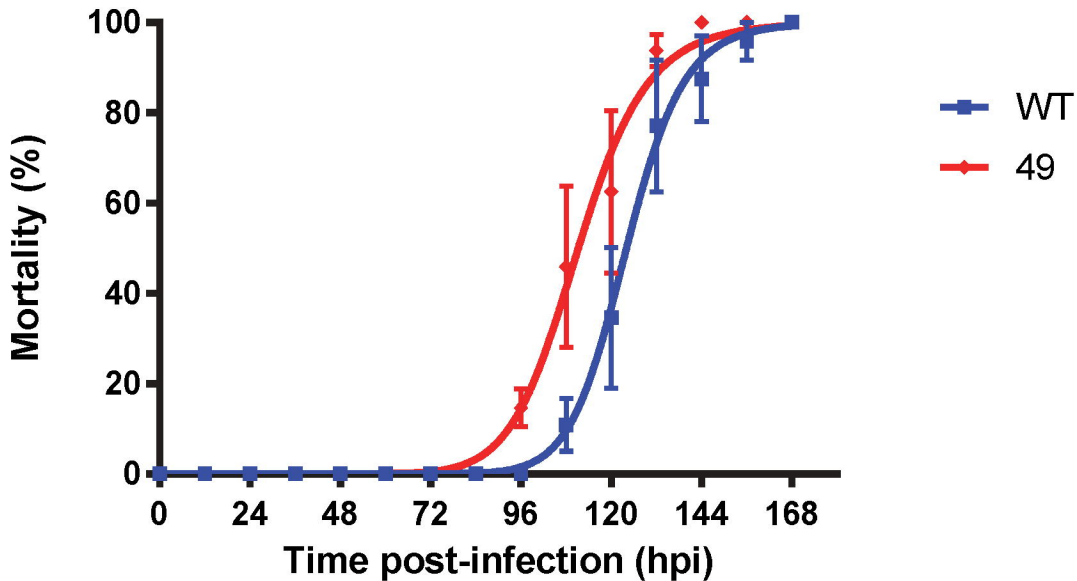

**A**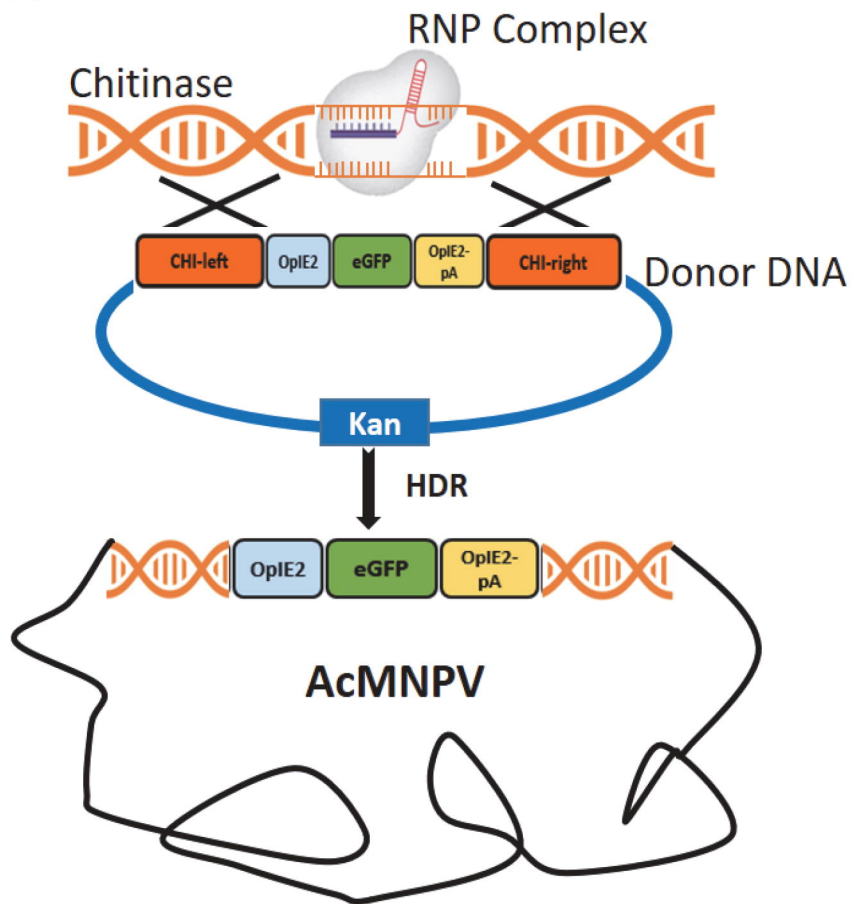**B**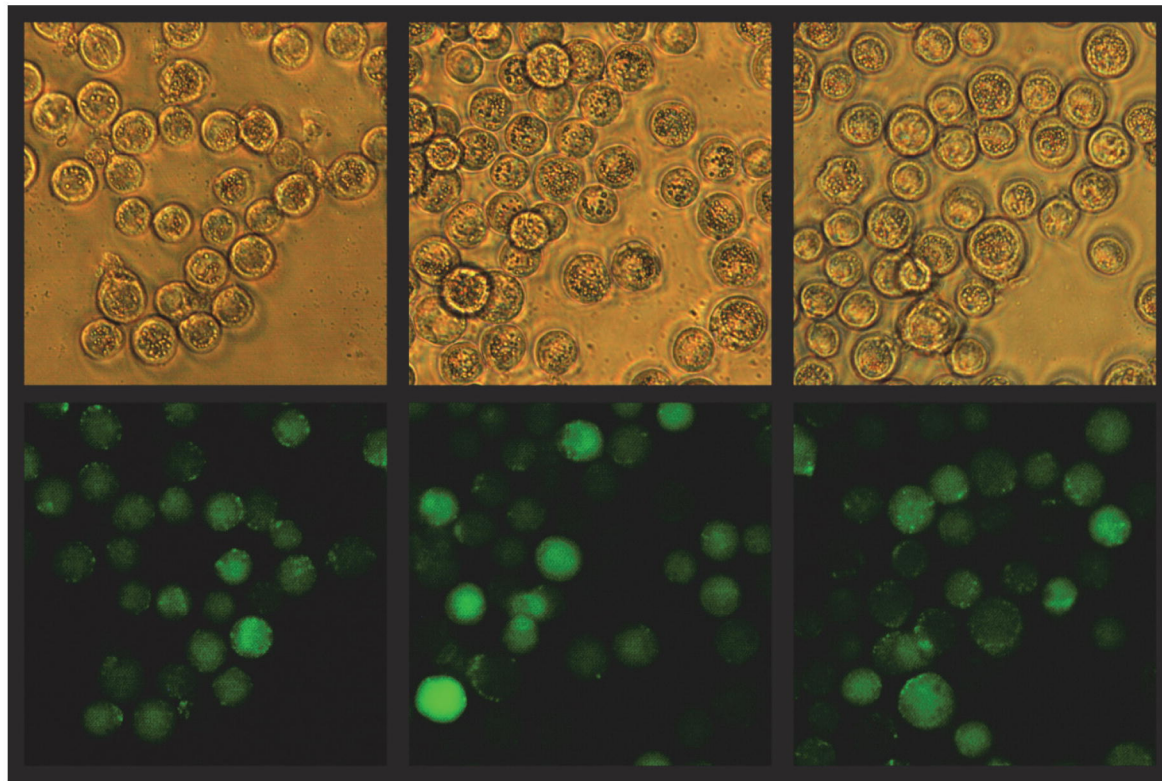

Source: https://www.biorxiv.org/content/10.1101/662890v1.full.pdf
